# Supplementary material for: The Membrane-targeting antibacterial effects of Tanacetum argyrophyllum essential oil against antibiotic-resistant Escherichia coli
Source: Research Square preprint supplement (doi:10.21203/rs.3.rs-6666651/v1), 2025-05-23
Supplement: Supplementary file 1 [file 2351e59a791724d9d6348189.xlsx]

## Sheet: Sheet1
K12
8.98
13.2		5.3033
22.5
30
K12+P
4.76
14.1		4.52548
20.5
pARG25
4.98
7.15		1.08565
6
pARG25+P
3.94
4		0.034641
4
