# Supplementary material for: The Membrane-targeting antibacterial effects of Tanacetum argyrophyllum essential oil against antibiotic-resistant Escherichia coli
Source: Research Square preprint supplement (doi:10.21203/rs.3.rs-6666651/v1), 2025-05-23
Supplement: Supplementary file 2 [file 5e1c3855c924b8bc8c7421f2.xlsx]

## Sheet: flux
K12	Total mean	SD	DCCD-sensitive			KAN+	Total mean	SD	DCCD-sensitive
T-D-	24.61	0.6755				T-D-	3.94	0.02
T-D+	8.82	0.31	15.79			T-D+	1.61	0.03	2.33
T+D-	9.72	0.4				T+D-	2.15	0.3
T+D+	6.26	0.02	3.46			T+D+	0.81	0.05	1.34

## Sheet: K12
N	C1		C2		C3				G+DCCD1		G+DCCD2		G+DCCD3			G+oil1		G+oil2		G+oil3			G+DCCD+oil1		G+DCCD+oil2		G+DCCD+oil3
փորձ լ-թ	6.945		6.882		6.85				6.91		6.946		6.936			6.926		6.86		6.957			6.902		6.93		6.915
փորձ լ-թ+մանրէ	6.916		6.852		6.84				6.832		6.872		6.84			6.88		6.86		6.896			6.857		6.855		6.878
(+pijma)															time min	6.869		6.855		6.882		time min	6.838		6.839		6.865
0	6.913	0.024436	6.849	0.0283159	6.841	0.0288423			6.822	0.0301321	6.873	0.0267935	6.828	0.0297187	0	6.874	0.0267319	6.856	0.0278631	6.87	0.0269793	0	6.832	0.0294463	6.83	0.0295822	6.859	0.0283159
0.25	6.912	0.0244923	6.839	0.0289754	6.839	0.0289754			6.812	0.030834	6.863	0.0274176	6.825	0.0299247	0.25	6.872	0.0268553	6.855	0.0279274	6.87	0.0269793	0.25	6.832	0.0294463	6.844	0.0286438	6.849	0.0295822
0.5	6.91	0.0246054	6.829	0.0296504	6.823	0.0300628			6.792	0.0322872	6.851	0.0281858	6.809	0.0310477	0.5	6.866	0.0272289	6.849	0.0283159	6.86	0.0276077	0.5	6.823	0.0300628	6.839	0.0289754	6.83	0.0309051
0.75	6.904	0.0249477	6.815	0.0306217	6.803	0.0314797			6.765	0.0343582	6.83	0.0295822	6.794	0.0321388	0.75	6.852	0.028121	6.834	0.029311	6.839	0.0289754	0.75	6.817	0.0304811	6.83	0.0295822	6.811	0.0331154
1	6.895	0.0254701	6.792	0.0322872	6.774	0.0336535			6.741	0.0363103	6.808	0.0311193	6.774	0.0336535	1	6.837	0.0291092	6.817	0.0304811	6.812	0.030834	1	6.807	0.0311911	6.819	0.030341	6.781	0.0358121
1.5	6.874	0.0267319	6.745	0.0359774	6.69	0.0408348			6.63	0.0468846	6.769	0.0340432	6.738	0.036562	1.5	6.798	0.0318442	6.78	0.0331917	6.748	0.0357298	1.5	6.791	0.0323616	6.793	0.0322129	6.747	0.0388177
2	6.852	0.028121	6.699	0.0399972	6.643	0.0455019			6.576	0.0530921	6.735	0.0368154	6.705	0.0394485	2	6.754	0.0352395	6.737	0.0366463	6.677	0.0420756	2	6.769	0.0340432	6.761	0.0346761	6.712	0.0418822
2.5	6.826	0.0298559	6.649	0.0448776	6.535	0.0583485			6.518	0.0606778	6.696	0.0402745	6.671	0.0426609	2.5	6.709	0.0390868	6.691	0.0407408	6587	0	2.5	6.742	0.0362268	6.732	0.0370706	6.679	0.0452929
3	6.792	0.0322872	6.597	0.050586	6.459	0.0695072			6.448	0.0712902	6668	0	6.639	0.045923	3	6.655	0.0442619	6.639	0.045923	6.5	0.0632456	3	6.716	0.0384618	6.705	0.0394485	6.645	0.0485322
3.5	6.749	0.0356476	6.545	0.0570204	6.337	0.0920513			6.376	0.0841453	6.642	0.0456068	6.604	0.0497771	3.5	6.59	0.0514079	6.567	0.0542038	6.392	0.0811017	3.5	6.679	0.0418822	6.678	0.0419788	6.615	0.0522432
4	6.711	0.0389072	6.494	0.0641254	6.202	0.125612			6.3	0.100237	6.619	0.0480873	6.571	0.0537069	4	6.516	0.0609579	6.517	0.0608177	6.272	0.106913	4	6.645	0.0452929	6.647	0.0450848	6.583	0.056238
4.5	6.66	0.0437552	6.438	0.0729508	6.002	0.199081			6.218	0.121068	6.596	0.0507026	6.537	0.0580805	4.5	6.436	0.0732875	6.456	0.069989	6.137	0.145892	4.5	6.603	0.0498919	6.616	0.0484206	6.551	0.0597077
5	6.608	0.0493208	6.384	0.0826095	5.886	0.260034			6.121	0.151367	6.573	0.0534601	6.501	0.0631001	5	6.352	0.0889263	6.365	0.0863038	5.599	0.503535	5	6.557	0.0554664	6.593	0.051054	6.525	0.0642732
5.5	6.55	0.0563677	6.325	0.0946303	5.705	0.394485			6.029	0.187081	6.552	0.0561087	6.461	0.0691879	5.5	6.264	0.108901	6.309	0.0981816	5.85	0.282508	5.5	6.505	0.0625216	6.562	0.0548315	6.493	0.0680816
6	6.485	0.0654681	6.262	0.109403	5.538	0.579469					6.53	0.0590242	6.421	0.075863	6	6.167	0.136154	6.232	0.117228	5.706	0.393577	6	6.455	0.0701504	6.527	0.0594333	6.468	0.073119
6.5	6.421	0.075863	6.19	0.129131	5.39	0.814761					6.511	0.0616638	6.38	0.0833739	6.5	6.055	0.17621	6.152	0.140939	5.584	0.521231	6.5	6.384	0.0826095	6.487	0.0651673	6.437	0.077809
7	6.34	0.0914176	6.104	0.157409	5.274	1.06422					6.493	0.0642732	6.339	0.0916284	7	5.94	0.229631	6.063	0.172994	5.484	0.656191	7	6.331	0.0933319	6.443	0.0721157	6.41	0.0833739
7.5	6.254	0.111437	6.003	0.198623	5.156	1.39646					6.474	0.0671475	6.3	0.100237	7.5	5.699	0.399972	5.971	0.213811	5.395	0.805434	7.5	6.272	0.106913	6.403	0.0790733	6.38	0.088111
8	6.169	0.135528	5.902	0.250628	5.105	1.57047					6.452	0.0706366	6.255	0.111181	8	5.579	0.527266	5.871	0.269172	5.314	0.970577	8	6.216	0.121627	6.367	0.0859073	6.356	0.0941955
8.5	6.07	0.170228	5.798	0.318442	5.05	1.7825					6.426	0.0749946	6.214	0.122188	8.5	5.492	0.644214	5.76	0.34756	5.241	1.14823	8.5	6.155	0.139968	6.333	0.0929031	6.327	0.100469
9	5.99	0.204659	5.7	0.399052	5.002	1.99081					6.396	0.0803582	6.172	0.134595	9	5.409	0.779884	5.665	0.432544	5.177	1.33055	9	6.096	0.160336	6.301	0.100007	6.299	0.107406
9.5			5.602	0.500069	4.96	2.19296					6.372	0.0849239	6.135	0.146565	9.5	5.331	0.933319	5.57	0.538307	5.122	1.51018	9.5	6.03	0.186651	6.265	0.10865	6.27	0.107406
10			5.516	0.609579	4.923	2.38798					6.345	0.0903712	6.087	0.163693	10	5.262	1.09403	5.485	0.654681	5.069	1.7062	10	5.966	0.216287	6.232	0.117228	6.243	0.114296
OD600nm (50x նոսրացված)	0.5764		0.6762		0.8105				0.6814		0.6372		0.811			0.614		0.6042		0.7728			0.5593		0.6372		0.757
CFU	653.1		671.966		697.353				672.949		664.594		697.448			660.208		658.355		690.227			649.868		664.594		687.24
ΔmM H+ 2-1	0.00416622		0.0345006		0.00481117				0.00617817		0.00432578		0.00778392			0.000496983		0.00045274		0.0811017					0.00136557		0.00749624
ΔmM H+ 3-2	0.00662003		0.048006		0.0017				0.00402314		0.00569613		0.00830331			0.00724261		0.00216518		0.000628428			0.00112821		0.00433507		0.00607013
ΔmM H+ 4-3	0.0104136		0.0184841		0.00832982				0.0181981		-0.0368154		0.0121575			0.00626619		0.00927668		0.0112416			0.00441866		0.00477237		0.00664995
ΔmM H+ 5-4	0.0161474		0.0105887		0.0561044				0.0289472		0.0480873		0.00607874			0.035613		0.00216518		0.00199618			0.00683105		0.00563633		0.00770581
ΔmM H+6-5	0.0259495		0.0135394		0.0240053				0.01749		-0.0155597		0.00778392			0.0472276		0.00927668		0.0112416			0.0101735		0.00455372		0.00636004
ΔmM H+ 5-3/2	0.0132805		0.0519965		0.134422				0.0511291		0.00537287		0.0093932			0.0419109		0.00616523		0.396623
ΔmM H+ av	0.01328		0.0448		0.00253				0.00044		0.00146		0.00101					0.01277		0.00293			0.00075		0.00086		0.00055
g [H+]	25		23.83		25				9.18		8.57		8.71			10.22		9.37		9.59			6.35		6.21		6.24
V	24.61								8.82							9.72							6.26
SD				0.6755								0.319531							0.441173						0.0212132

## Sheet: pARG25
N	C1		C2		C3				G+DCCD1		G+DCCD2		G+DCCD3			G+oil1		G+oil2		G+oil3			G+DCCD+oil1		G+DCCD+oil2		G+DCCD+oil3
փորձ լ-թ	7.095		7.274		7.264				7.081		7.244		7.265			7.07		7.276		7.222			7.024		7.246		7.226
փորձ լ-թ+մանրէ	7.066		7.264		7.28				7.046		7.247		7.261			7.04		7.259		7.212			7.021		7.23		7.237
(+pijma)	_		_		_				_		_		_		time min	7.234		7.277		7.193		time min	7.189		7.223		7.25
0	7.054	0.0176616	6.96	0.0219296	6.894	0.0255288			7.033	0.0185366	6.885	0.0260633	6.85	0.0282508	0	6.979	0.0209908	6.895	0.0254701	6.807	0.0311911	0	6.735	0.0368154	6.917	0.024212	6.771	0.0338868
0.25	7.048	0.0179073	6.938	0.0230691	6.892	0.0256466			7.017	0.0192322	6.878	0.0264868	6.845	0.0285779	0.25	6.964	0.0217285	6.891	0.0257057	6.807	0.0311911	0.25	6.739	0.0364779	6.917	0.024212	6.77	0.0339649
0.5	7.041	0.0181983	6.919	0.0241007	6.886	0.0260034			7.005	0.0197711	6.867	0.0271663	6.837	0.0291092	0.5	6.957	0.0220816	6.885	0.0260633	6.803	0.0314797	0.5	6.83	0.0295822	6.912	0.0244923	6.769	0.0340432
0.75	7.034	0.018494	6.9	0.0251785	6.879	0.0264259			6.994	0.0202782	6.861	0.0275442	6.829	0.0296504	0.75	6.954	0.0222346	6.875	0.0266704	6.796	0.0319912	0.75	6.89	0.025765	6.909	0.0246621	6.765	0.0343582
1	7.025	0.0188812	6.88	0.0263651	6.871	0.0269172			6.985	0.0207028	6.853	0.0280563	6.822	0.0301321	1	6.951	0.0223888	6.862	0.0274808	6.79	0.0324362	1	6.895	0.0254701	6.902	0.0250628	6.76	0.034756
1.5	7.01	0.0195447	6.847	0.0284466	6.854	0.0279917			6.971	0.0213811	6.841	0.0288423	6.807	0.0311911	1.5	6.949	0.0224921	6.827	0.0297872	6.775	0.0335761	1.5	6.896	0.0254115	6.89	0.025765	6.756	0.0350776
2	6.998	0.0200923	6.812	0.030834	6.837	0.0291092			6.963	0.0217786	6.83	0.0295822	6.793	0.0322129	2	6.946	0.022648	6.79	0.0324362	6.759	0.0348361	2	6.899	0.0252366	6.879	0.0264259	6.752	0.0354022
2.5	6.989	0.020513	6.776	0.0334989	6.82	0.0302712			6.958	0.0220308	6.818	0.030411	6.782	0.0330392	2.5	6.944	0.0227525	6.756	0.0350776	6.744	0.0360604	2.5	6.901	0.0251206	6.864	0.0273546	6.75	0.0355656
3	6.98	0.0209426	6.738	0.036562	6.806	0.031263			6.953	0.0222859	6.809	0.0310477	6.773	0.0337311	3	6.943	0.022805	6.73	0.0372417	6.729	0.0373276	3	6.904	0.0249477	6.85	0.0282508	6.747	0.0358121
3.5	6.973	0.0212829	6.706	0.0393577	6.789	0.032511			6.95	0.0224404	6.801	0.031625	6.765	0.0343582	3.5	6.94	0.0229631	6.703	0.0396305	6.713	0.0387284	3.5	6.911	0.0245488	6.836	0.0291763	6.746	0.0358947
4	6.964	0.0217285	6.671	0.0426609	6.773	0.0337311			6.948	0.0225439	6.794	0.0321388	6.759	0.0348361	4	6.938	0.0230691	6.671	0.0426609	6.696	0.0402745	4	6.917	0.024212	6.825	0.0299247	6.745	0.0359774
4.5	6.953	0.0222859	6.635	0.0463479	6.756	0.0350776			6.945	0.0227002	6.787	0.032661	6.754	0.0352395	4.5	6.934	0.0232825	6.634	0.0464547	6.678	0.0419788	4.5	6.923	0.0238798	6.813	0.0307631	6.744	0.0360604
5	6.938	0.0230691	6.601	0.0501222	6.737	0.0366463			6.944	0.0227525	6.778	0.0333449	6.75	0.0355656	5	6.93	0.023498	6.6	0.0502377	6.665	0.0432544	5	6.927	0.0236608	6.803	0.0314797
5.5	6.917	0.024212	6.567	0.0542038	6.717	0.0383734			6.942	0.0228576	6.768	0.0341216	6.748	0.0357298	5.5	6.925	0.02377	6.562	0.0548315	6.65	0.0447744	5.5	6.933	0.0233362	6.792	0.0322872
6	6.889	0.0258244	6.529	0.0591602	6.697	0.0401819			6.941	0.0229103	6.756	0.0350776	6.744	0.0360604	6	6.919	0.0241007	6.526	0.0595703	6.637	0.0461349	6	6.938	0.0230691	6.781	0.0331154
6.5	6.86	0.0276077	6.483	0.0657703	6.677	0.0420756			6.94	0.0229631	6.744	0.0360604	6.74	0.036394	6.5	6.91	0.0246054	6.462	0.0690287	6.619	0.0480873	6.5	6.944	0.0227525	6.766	0.0342791
7	6.839	0.0289754	6.44	0.0726156	6.659	0.0438561			6.94	0.0229631	6.735	0.0368154	6.735	0.0368154	7	6.9	0.0251785	6.454	0.0703121	6.6	0.0502377	7	6.947	0.0225959	6.748	0.0357298
7.5	6.821	0.0302016	6.395	0.0805434	6.642	0.0456068					6.725	0.037673	6.729	0.0373276	7.5	6.89	0.025765	6.415	0.0769184	6.568	0.0540792	7.5	6.951	0.0223888	6.728	0.0374136
8	6.808	0.0311193	6.345	0.0903712	6.624	0.0475368					6.72	0.0381092	6.723	0.0378469	8	6.878		6.375	0.0843393	6.534	0.058483	8			6.709	0.0390868
8.5	6.795	0.0320649	6.296	0.101165	6.607	0.0494345					6.714	0.0386394	6.718	0.0382851	8.5	6.868		6.333	0.0929031	6.502	0.062955	8.5			6.69	0.0408348
9	6.784	0.0328874	6.246	0.113509	6.588	0.0516452					6.708	0.0391769	6.712	0.0388177	9	6.856		6.292	0.102101	6.46	0.0693474	9			6.675	0.0422698
9.5	6.773		6.192	0.128538	6.568	0.0540792					6.703	0.0396305	6.704	0.0395394	9.5	6.845		6.251	0.11221	6.437	0.073119	9.5			6.663	0.043454
10	6.763		6.139	0.145221	6.545	0.0570204					6.695	0.0403673	6.696	0.0402745	10	6.832		6.21	0.123319	6.408	0.0781682	10			6.649	0.0448776
OD600nm (50x նոսրացված)	0.25		0.457		0.5039				0.25		0.665		0.5068			0.24		0.788		0.5945			0.24		0.665		0.7577
CFU	591.399		630.529		639.395				591.399		669.849		639.943			589.509		693.1		656.522			589.509		669.849		687.372
ΔmM H+ 2-1	0.000850255		0.0115665		0.00138843				0.00216625		0.00199294		0.00110508			0.00109072		0.000593274		0.00266808					0.0005705		0.000869261
ΔmM H+ 3-2	0.000785942		0.0134554		0.0017				0.00107576		0.00152589		0.000881353			0.000260446		0.0014175		0.000288607			-0.000233511		0.00136309		0.000646163
ΔmM H+ 4-3	0.00134055		0.0147731		0.0017902				0.000507289		0.00146557		0.00150846			0.000295949		0.00480554		0.00239994			-0.00028888		0.00182484		0.000409938
ΔmM H+ 5-4	0.00275532		0.0177556		0.00291523				0.000258058		0.00109108		0.00075423			0.000487524		0.00541916		0.000800111			-0.000735708		0.00167396		0.000165301
ΔmM H+6-5	0.00315105		0.0206215		0.00370219				0.000791524		0.00149573		0.00110508			0.000602768		0.00455293		0.000956545			-0.000551132		0.00159396		0.00052805
ΔmM H+ 5-3/2	0.00204794		0.0131698		0.00367424				0.000208597		0.00120612		0.000729451			0.000545465		0.00495536		0.00297989
ΔmM H+ av	0.00232		0.01522		0.00253				0.00044		0.00146		0.00101			0.00041		0.01277		0.00293			0.00075		0.00086		0.00055
g [H+]	3.92		3.95		3.95				1.63		1.62		1.57			1.85		2.05		2.56			1.23		0.85		0.77
V	3.935								1.61							2.15							0.81
SD				0.0212132								0.0321455							0.366106						0.0565685
