# Supplementary material for: The Membrane-targeting antibacterial effects of Tanacetum argyrophyllum essential oil against antibiotic-resistant Escherichia coli
Source: Research Square preprint supplement (doi:10.21203/rs.3.rs-6666651/v1), 2025-05-23
Supplement: Supplementary file 3 [file 66c62d1d9dff75afb2dff379.xlsx]

## Sheet: SGR
Grown in MP media at pH7.5
	E. coli K12						E. coli pARG25
	Control			Tanacetum			Control			Tanacetum
Time	1	2	3	1	2	3	1	2	3	1	2	3
0	0.03	0.1	0.21	0.16	0.08	0.2	0.08	0.19	0.13	0.15	0.08	0.16
0.5	0.15	0.14	0.36	0.27	0.16	0.29	0.15	0.23	0.18	0.17	0.09	0.29
1	0.25	0.25	0.44	0.29	0.19	0.33	0.24	0.26	0.21	0.28	0.15	0.31
1.5	0.58	0.34	0.65	0.41	0.3	0.49	0.28	0.36	0.23	0.25	0.23	0.46
2	1.12	0.79	1.19	0.63	0.46	0.8	0.44	0.48	0.31	0.29	0.3	0.52
2.5	1.71	1.3	1.8	1.06	0.71	1.09	0.54	0.67	0.57	0.31	0.48	0.54
3	3.13	2.51	3.03	2.1	1.36	2.32	0.8	0.92	0.77	0.55	0.54	0.76
3.5	4.93	3.66	4.31	3.38	2.43	3.46	1.13	1.23	1.09	0.73	0.8	0.95
4	6.04	5.16	6.22	4.8	3.65	4.76	1.65	1.74	1.44	1.12	1.07	1.26
4.5	6.96	6.44	7.35	6.25	4.74	5.68	2.25	2.4	2.17	1.7	1.69	1.89
5	7.68	7.1	7.99	6.75	6.12	6.41	3.05	3.07	2.9	2.2	2.27	2.49
5.5	7.77	7.36	8.26	6.93	6.37	6.64	3.66	3.69	3.56	2.84	2.78	3.11
6	7.97	7.64	8.39	6.95	6.46	7	4.73	4.64	4.3	3.53	3.56	3.91
6.5	8.07	7.69	8.42	7.04	6.8	7	5.25	5.19	5.02	4.31	4.34	4.8
7	8.16	7.77	8.51	7.18	6.88	7	6.03	5.96	5.74	4.81	4.88	5.46
7.5	8.34	7.95	8.6	7.19	7.09	7.14	6.18	6.7	6.56	6.78	5.56	5.58
8	8.34	7.95	8.6	7.38	7.09	7.18	7.25	7.14	7.08	5.69	5.81	6.43
24	11.13	9.96	11.63	8.89	8.42	8.67	10.18	10.23	10.01	7.89	7.91	8.87
μ1	0.866434	1.38629	0.866434	0.770164	0.630134	0.693147	0.815467	0.66014	0.630134	0.770164	0.693147	0.681171
μ2	0.99021	1.73287	0.924196	0.577623	0.693147	0.577623	0.693147	0.478033	0.407734	0.513442	0.374674	0.462098
μ3	1.15525	1.15525	0.99021	0.693147	0.99021	0.447192	0.478033	0.35546	0.33007	0.447192	0.433217	0.630134
μ միջ․	1.072	1.155	0.99	0.6803	0.661	0.635	0.662	0.66	0.63	0.447	0.374	0.462
μ	1.072			0.658			0.65			0.427
±	0.0811641			0.0227324			0.0179258			0.0470779
		Cell doubling time
		0.646593			1.05342			1.06638			1.6233
