# Supplementary material for: The Membrane-targeting antibacterial effects of Tanacetum argyrophyllum essential oil against antibiotic-resistant Escherichia coli
Source: Research Square preprint supplement (doi:10.21203/rs.3.rs-6666651/v1), 2025-05-23
Supplement: Supplementary file 4 [file a5d05664c54f72d0a7dc71c1.xlsx]

## Sheet: K12
			Total (Mean)	SD	DCCD-sensitive
		T-D-	223.04	2.62
		T-D+	80.66	1.84	142.38
		T+D-	134.44	6.13
		T+D+	23.75	2.04	110.69

## Sheet: pARG25
		Total mean	SD	DCCD-sensitive
	M-D-	318.1	12.09
	M-D+	89.21	4.11	228.89
	M+D-	206.55	10.21
	M+D+	25.62	5.31	180.93

## Sheet: SD cal
				220
				234
				197
			mean	217
			SD	18.6815

## Sheet: p st curve
C, mM	N1		AV. OD 710
0	0		0
0.1	0.18		0.18
0.2	0.269		0.269
0.3	0.379		0.379
0.4	0.439		0.439
0.5	0.493		0.493
0.6	0.525		0.525
0.7	0.539		0.539
10mM	1000mcl
0.1mM	10mcl
2.5 ml	100mcg protein
0.5 ml	x
	x=20mcg protein

## Sheet: K12 T-D-
N1
	T-D-
0	0.271	0.001	0.0084
5	0.276	0.0034	0.011	0.0059	0.00438662	219.331
10	0.305	0.00593333		av	mM P/min	nM P/min µg protein
15	0.36	0.0058
N2
	T-D-							223.04
0	0.25	0.0042	0.0064					2.62865
5	0.271	0.007	0.003	0.006	0.00446097	223.048
10	0.32	0.00566667		av	mM P/min	nM P/min µg protein
15	0.335	0.0098
N3
	T-D-
0	0.254	0.0014	0.0089
5	0.261	0.0066	0.006	0.00685	0.00509294	254.647
10	0.32	0.0064		av	mM P/min	nM P/min µg protein
15	0.35	0.0118

## Sheet: K12 T-D+
N1
	T-D+
0	0.264	0.0006	0.0041
5	0.267	0.0027	0.0034	0.002	0.00148699	74.3494
10	0.291	0.00293333		av	mM P/min	nM P/min µg protein
15	0.308	0.0048
N2
	T-D+							80.66
0	0.27	0.0018	0.0025					4.4687
5	0.279	0.0025	0.0018	0.00217	0.00161338	80.6691
10	0.295	0.00226667		av	mM P/min	nM P/min µg protein
15	0.304	0.0032
N3
	T-D+
0	0.27	0.0018	0.0027
5	0.279	0.0025	0.0022	0.0024	0.00178439	89.2193
10	0.295	0.0024		av	mM P/min	nM P/min µg protein
15	0.306	0.0032

## Sheet: K12 T+D-
N1
min	T+D-
0	0.193	0.005	0.0032
5	0.218	0.004	0.0034	0.00373333	0.00277571	138.786
10	0.233	0.0038		av	mM P/min	nM P/min µg protein
15	0.25	0.003						134.44
		ΔOD/min						6.13352
N2
min	T+D-
0	0.229	0.004	0.0035
5	0.249	0.0031	0.0048	0.0035	0.00260223	130.112
10	0.26	0.00366667		av	mM P/min	nM P/min µg protein
15	0.284	0.0022
		ΔOD/min
N3
min	T+D-
0	0.229	0.004	0.0045
5	0.249	0.0031	0.0068	0.0041	0.00304833	152.416
10	0.26	0.00433333		av	mM P/min	nM P/min µg protein
15	0.294	0.0022
		ΔOD/min

## Sheet: K12 T+D+
N1
	T-D+
0	0.226	0	0.001
5	0.226	0.0004	0.0012	0.000677778	0.000503924	25.1962
10	0.23	0.000666667		av	mM P/min	nM P/min µg protein
15	0.236	0.0008
N2
	T-D+
0	0.222	0.0004	0.0007					23.75
5	0.224	0.0007	0.0004	0.0006	0.000446097	22.3048		2.04451
10	0.229	0.0006		av	mM P/min	nM P/min µg protein
15	0.231	0.001
N3
	T-D+
0	0.216	0.0018	0.004
5	0.225	0.0018	0.0062	0.0003	0.000223048	11.1524
10	0.234	0.00326667		av	mM P/min	nM P/min µg protein
15	0.265	0.0018

## Sheet: pARG T+D-
N1
	T+D-
0	0.32	0.0072	0.0082
5	0.356	0.0083	0.007	0.00799444	0.00594382	297.191
10	0.403	0.00786667		av	mM P/min	mcM P/min
15	0.438	0.0094
N2								206.21
	T+D-							128.658
0	0.223	0.0042	0.0026
5	0.244	0.0038	0.0018	0.0031	0.00230483	115.242
10	0.261	0.00313333		av	mM P/min	mcM P/min
15	0.27	0.0034
N3
	T+D-
0	0.228	0.0018	0.0009
5	0.237	0.0013	0.001	0.001325	0.00110693	55.3467
10	0.241	0.0012		av	mM P/min	mcM P/min
15	0.246	0.0008

## Sheet: PARG25 T-D-
N1
min	T-D-
0	0.25	0.0134	0.0071
5	0.317	0.0108	0.006	0.00911	0.00677323	338.662
10	0.358	0.0092		av	mM P/min	nM P/min µg protein
15	0.388	0.0082
		ΔOD/min
N2
min	T-D-
0	0.254	0.0044	0.0049					318.03
5	0.276	0.0031	0.008	0.008	0.00594796	297.398		29.178
10	0.285	0.00473333		av	mM P/min	nM P/min µg protein
15	0.325	0.0018
		ΔOD/min
N3
min	T-D-
0	0.219	0.0084	0.0096
5	0.261	0.0088	0.01	0.0092	0.00768588	384.294
10	0.307	0.0092		av	mM P/min	nM P/min µg protein
15	0.357	0.0092
		ΔOD/min

[truncated: 2 more sheets: pARG T-D+, pARG25 T+D+]
